# Supplementary material
Source: publisher site journal article supplement (https://www.dovepress.com/article/290795)
Supplement: Supplementary file 1 [file get_supplementary_file.php]

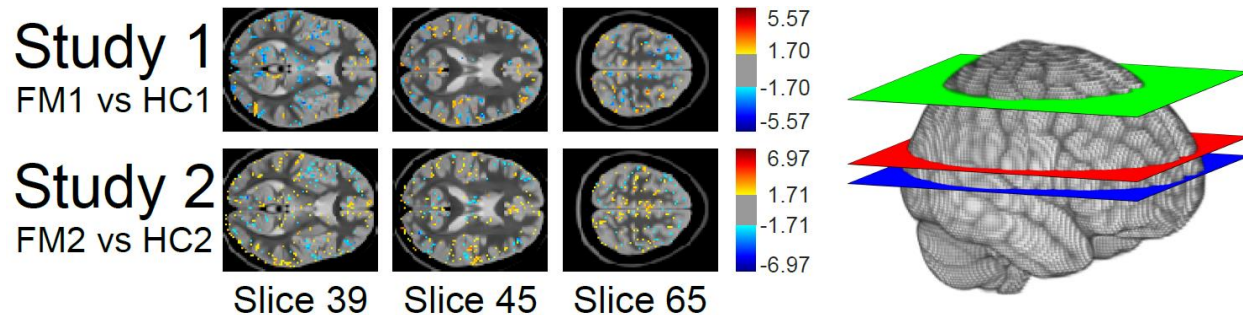

**Supplementary 1.** Comparison of group-level GLM results from the model-driven analyses with uncorrected  $t$ -thresholds. Study 1 compares HC1 and FM1 results. Study 2 compares HC2 and FM2 results. Voxels that surpassed the uncorrected  $t$ -threshold of  $\pm 1.70$  for Study 1 and  $\pm 1.71$  for Study 2 are indicated in color, based on the color bars that represent  $t$ -scores adjacent to the slices. The corrected  $t$ -threshold for significance was  $\pm 5.41$  for Study 1, and  $\pm 5.61$  for Study 2. The diagram on the right shows the location of each selected slice within the brain. Slice 39 is blue. Slice 45 is red. Slice 65 is green.
